# Supplementary material
Source: MDPI journal article supplement (https://www.mdpi.com/1424-8247/17/2/203)
Supplement: s1 [file s1]

## Supplementary information

### A Multi-Residue Analytical Method for Assessing the Effects of Stacking Treatment on Antimicrobial and Coccidiostat Degradation in Broiler Litter

Solomon Efriem <sup>1,2</sup>, Malka Britzi <sup>2</sup>, Stefan Soback <sup>2</sup>, Chris Sabastian <sup>1</sup> and Sameer J. Mabjeesh <sup>1,\*</sup>

<sup>1</sup> The Robert H. Smith Faculty of Agriculture, Food and Environment, Hebrew University, P.O. Box 12, Rehovot 7610001, Israel

<sup>2</sup> National Residue Control Laboratory, Kimron Veterinary Institute, Beit Dagan 5025001, Israel

\* Correspondence: sameer.mabjeesh@mail.huji.ac.il; Tel.: +972-8-9489314

**Table S1.** Antibiotics and coccidiostats approved for use in poultry by national regulatory authorities in the USA, Brazil, China, Poland, United Kingdom, Germany, France, Israel and Spain, based on national reports as described in Section 1.

| Coccidiostates | Fluoroquinolones | beta-Lactams | Tetracyclines     | Macrolides    | Sulfonamides          |
|----------------|------------------|--------------|-------------------|---------------|-----------------------|
| Lasalocid      | Ciprofloxacin**  | Amoxicillin  | Chlortertacycline | Tilmicosin    | Sulfachloropyrazine   |
| Maduramicin    | Danofloxacin     | Ampicillin   | Doxycycline       | Tylosin       | Sulfachloropyridazine |
| Monensin       | Enrofloxacin     |              | Oxytetracycline   | Erythromycin* | Sulfadiazine          |
| Narasin        | Norfloxacin      |              | Tetracycline      |               | Sulfadimethoxine      |
| Salinomycin    |                  |              |                   |               | Sulfisoxazole*        |
| Semduramycin   |                  |              |                   |               | Sulfadimidine         |
| Diclazuril     |                  |              |                   |               |                       |
| Robenidine     |                  |              |                   |               |                       |
| Decoquinat     |                  |              |                   |               |                       |
| Clopidol       |                  |              |                   |               |                       |
| Nicarbazine    |                  |              |                   |               |                       |

Source, Israeli Drug Registry [27].

\* Not approved in Israel

\*\* Metabolite of enrofloxacin and used in humans

**Table S2.** Intra-day analytical recovery (in %) of 30 anti-microbials and coccidiostats in poultry litter as described in Section 2.1.1.

| Group            | Analyte                | 0.1<br>mg•kg <sup>-1</sup> | 0.5 ppm<br>mg•kg <sup>-1</sup> | 1.5 ppm<br>mg•kg <sup>-1</sup> | RSD % |
|------------------|------------------------|----------------------------|--------------------------------|--------------------------------|-------|
| Coccidiostats    | Narasin                | 76                         | 86                             | 92                             | 4     |
|                  | Diclazuril             | 95                         | 113                            | 96                             | 10    |
|                  | Clopidol               | 101                        | 103                            | 97                             | 3     |
|                  | Nicrbazine             | 80                         | 98                             | 95                             | 10    |
|                  | Maduramicin            | 88                         | 90                             | 84                             | 3     |
|                  | Monensin               | 87                         | 96                             | 96                             | 5     |
|                  | Robenidine             | 116                        | 111                            | 105                            | 6     |
|                  | Salinomycin            | 70                         | 90                             | 95                             | 13    |
|                  | Semduramycin           | 112                        | 115                            | 101                            | 7     |
|                  | Lasalocid              | 113                        | 113                            | 101                            | 7     |
|                  | Decoquinate            | 105                        | 80                             | 105                            | 14    |
| Sulfonamides     | Sulfachloropyrazine    | 101                        | 102                            | 102                            | 1     |
|                  | Sulfachloropyridazine  | 110                        | 98                             | 101                            | 6     |
|                  | Sulfadiazine           | 112                        | 117                            | 109                            | 4     |
|                  | Sulfadimidine          | 130                        | 112                            | 99                             | 16    |
|                  | Sulfaquinoxaline       | 87                         | 96                             | 98                             | 6     |
|                  | Sulfadoxine            | 124                        | 117                            | 107                            | 9     |
| Macrolides       | Tilmicosin             | 103                        | 111                            | 104                            | 4     |
|                  | Tylosin                | 84                         | 94                             | 94                             | 6     |
|                  | Erythromycin           | 116                        | 97                             | 104                            | 10    |
| Fluoroquinolones | Danofloxacin           | 124                        | 106                            | 103                            | 11    |
|                  | Ciproflaxacin          | 128                        | 105                            | 105                            | 13    |
|                  | Norfloxacin            | 85                         | 97                             | 101                            | 8     |
|                  | Enrofloxacin           | 114                        | 119                            | 103                            | 8     |
| Tetracyclines    | Doxycycline hyclate    | 100                        | 102                            | 111                            | 6     |
|                  | Oxytetracycline        | 102                        | 95                             | 97                             | 4     |
|                  | Chlortetracycline      | 116                        | 110                            | 104                            | 6     |
|                  | Tetracycline           | 84                         | 118                            | 102                            | 17    |
| b-Lactams        | Amoxicillin trihydrate | 102                        | 94                             | 112                            | 9     |
|                  | Ampicillin             | 96                         | 104                            | 102                            | 4     |

**Table S3.** Inter-day analytical recovery (in %) of 30 antimicrobials and coccidiostats in broiler litter as described in Section 2.1.2.

| Group            | Analyte                | 0.1 mg•kg <sup>-1</sup> | 0.5 mg•kg <sup>-1</sup> | 1.5 mg•kg <sup>-1</sup> | RSD % |
|------------------|------------------------|-------------------------|-------------------------|-------------------------|-------|
| Coccidiostats    | Narasin                | 67                      | 102                     | 99                      | 20    |
|                  | Diclazuril             | 83                      | 99                      | 96                      | 9     |
|                  | Clopidol               | 74                      | 110                     | 103                     | 19    |
|                  | Nicrbazine             | 80                      | 101                     | 98                      | 12    |
|                  | Maduramicin            | 89                      | 107                     | 100                     | 9     |
|                  | Monensin               | 96                      | 101                     | 99                      | 3     |
|                  | Robenidine             | 76                      | 104                     | 99                      | 15    |
|                  | Salinomycin            | 84                      | 84                      | 100                     | 9     |
|                  | Semduramycin           | 89                      | 98                      | 102                     | 6.7   |
|                  | Lasalocid              | 92                      | 97                      | 99                      | 3.6   |
|                  | Decoquinate            | 94                      | 109                     | 97                      | 8     |
| Sulfonamides     | Sulfachloropyrazine    | 130                     | 105                     | 99                      | 16.5  |
|                  | Sulfachloropyridazine  | 83                      | 101                     | 99                      | 10    |
|                  | Sulfadiazine           | 105                     | 101                     | 100                     | 2.6   |
|                  | Sulfadimidine          | 86                      | 105                     | 105                     | 11    |
|                  | Sulfaquinoxaline       | 91                      | 98                      | 99                      | 4.4   |
|                  | Sulfadoxine            | 74                      | 93                      | 115                     | 20    |
| Macrolides       | Tilmicosin             | 70                      | 100                     | 98                      | 20    |
|                  | Tylosin                | 76                      | 100                     | 96                      | 12    |
|                  | Erythromycin           | 112                     | 107                     | 97                      | 7     |
| Fluoroquinolones | Danofloxacin           | 68                      | 102                     | 102                     | 5     |
|                  | Ciproflaxacin          | 94                      | 101                     | 104                     | 5.2   |
|                  | Norfloxacin            | 68                      | 93                      | 110                     | 25    |
|                  | Enrofloxacin           | 86                      | 104                     | 101                     | 9.6   |
| Tetracyclines    | Doxycycline Hyclate    | 70                      | 112                     | 98                      | 17    |
|                  | Oxytetracycline        | 124                     | 124                     | 103                     | 12    |
|                  | Chlortetracycline      | 70                      | 116                     | 96                      | 23    |
|                  | Tetracycline           | 78                      | 115                     | 99                      | 19    |
| b-Lactams        | Amoxicillin trihydrate | 103                     | 108                     | 107                     | 2.5   |
|                  | Ampicillin             | 101                     | 87                      | 103                     | 8.5   |

**Table S4.** Comparison of antimicrobial and coccidiostat degradation in poultry litter upon drying by oven or lyophilization described in Section 4.2.

| Compound            | Oven to<br>Lyophilisation<br>ratio | Control to<br>Lyophilisation<br>ratio | Compound     | Oven to<br>Lyophilisation<br>ratio | Control to<br>Lyophilisation<br>ratio |
|---------------------|------------------------------------|---------------------------------------|--------------|------------------------------------|---------------------------------------|
| Sulfachloropyrazine | 0.28                               | 0.95                                  | Monensin     | 0.54                               | 0.76                                  |
| Sulfadimidine       | 0.58                               | 0.96                                  | Salinomycin  | 0.43                               | 0.9                                   |
| Sulfadiazine        | 0.11                               | 0.93                                  | Semduramycin | 0.42                               | 0.9                                   |
| Sulfadoxine         | 0.57                               | 0.78                                  | Lasalocid    | 0.49                               | 0.95                                  |
| Sulfadimethoxine    | 0.53                               | 1.1                                   | Narasin      | 0.4                                | 0.82                                  |
| Sulfaquinoxaline    | 0.85                               | 0.9                                   | Decoquinate  | 0.34                               | 0.57                                  |

| Compound              | Oven to<br>Lyophilisation<br>ratio | Control to<br>Lyophilisation<br>ratio | Compound     | Oven to<br>Lyophilisation<br>ratio | Control to<br>Lyophilisation<br>ratio |
|-----------------------|------------------------------------|---------------------------------------|--------------|------------------------------------|---------------------------------------|
| Sulfachloropyridazine | 0.43                               | 1                                     | Robenidine   | 0.5                                | 0.74                                  |
| Doxycyclin            | 0.07                               | 0.95                                  | Maduramycin  | 0.51                               | 0.7                                   |
| Oxytetracycline       | 0.53                               | 0.62                                  | Nicarbazine  | 0.75                               | 0.9                                   |
| Chlortetracycline     | 0.47                               | 1.03                                  | Enrofloxacin | 0.71                               | 0.89                                  |

**Table S5.** LC/MS/MS conditions as described in Section 4.2.

#### Antimicrobials

Analytical column: Zorbax, Eclipse Plus, C18, 4.6×50 mm, 1.8μ, Agilent.

Mobile phase: A: Formic acid 0.2% B: acetonitrile

Volume of injection: 3 μl

Column oven: 40°C

Gradient conditions:

|   | Total Time<br>(min) | Flow rate<br>(μl/min) | A % | B % |
|---|---------------------|-----------------------|-----|-----|
| 1 | 0                   | 1200                  | 95  | 5   |
| 2 | 1                   | 1200                  | 30  | 70  |
| 3 | 1.5                 | 1200                  | 30  | 70  |
| 4 | 1.7                 | 1200                  | 95  | 5   |
| 5 | 3                   | 1200                  | 95  | 5   |

#### MS/MS parameters

Source: ESI

Polarity: positive

Scan type: MRM

Source:

CAD: 6

CUR: 35

IS: 5500

TEM: 600

GS1: 80

GS2: 60

Dwell time: 5msec

| Q1               | Q3 | ID | DP<br>(volts) | EP<br>(volts) | CE<br>(volts) | CXP<br>(volts) | R.T |
|------------------|----|----|---------------|---------------|---------------|----------------|-----|
| Fluoroquinolones |    |    |               |               |               |                |     |

| Q1            | Q3     | ID                      | DP<br>(volts) | EP<br>(volts) | CE<br>(volts) | CXP<br>(volts) | R.T  |
|---------------|--------|-------------------------|---------------|---------------|---------------|----------------|------|
| 360.2         | 316.4  | Enrofloxacin.1          | 86            | 10            | 29            | 0              | 1.79 |
| 360.2         | 245.2  | Enrofloxacin.2          | 86            | 10            | 37            | 6              | 1.79 |
| 332           | 314    | Ciprofloxacin.1         | 91            | 10            | 33            | 8              | 1.76 |
| 332           | 231    | Ciprofloxacin.2         | 86            | 10            | 33            | 8              | 1.76 |
| 358           | 340    | Danofloxacin.1          | 56            | 10            | 31            | 10             | 1.78 |
| 358           | 255    | Danofloxacin.2          | 56            | 10            | 31            | 10             | 1.78 |
| 320           | 302    | Norfloxacin.1           | 86            | 10            | 31            | 10             | 1.75 |
| 320           | 231    | Norfloxacin.2           | 81            | 10            | 31            | 10             | 1.75 |
| Sulfonamides  |        |                         |               |               |               |                |      |
| 285           | 156    | Sulfachloropyridazine.1 | 51            | 10            | 31            | 28             | 1.98 |
| 285           | 92     | Sulfachloropyridazine.2 | 51            | 10            | 31            | 28             | 1.98 |
| 254           | 156    | Sulfamethoxazole.1      | 66            | 10            | 23            | 28             | 2.01 |
| 254           | 92     | Sulfamethoxazole.2      | 66            | 10            | 23            | 28             | 2.01 |
| 251           | 156    | Sulfadiazine.1          | 66            | 10            | 23            | 28             | 1.74 |
| 251           | 92     | Sulfadiazine.2          | 66            | 10            | 23            | 28             | 1.74 |
| 256           | 156    | Sulfathiazole.1         | 66            | 10            | 23            | 28             | 1.77 |
| 256           | 92     | Sulfathiazole.2         | 61            | 10            | 23            | 28             | 1.77 |
| 279           | 186    | Sulfadimidine.1         | 71            | 10            | 25            | 34             | 1.91 |
| 279           | 124    | Sulfadimidine.2         | 66            | 10            | 25            | 34             | 1.91 |
| 311           | 156    | Sulfadoxine.1           | 71            | 10            | 29            | 28             | 2.01 |
| 311           | 92     | Sulfadoxine.2           | 81            | 10            | 29            | 28             | 2.01 |
| 301           | 156    | Sulfaquinoxaline.1      | 81            | 10            | 25            | 28             | 2.08 |
| 301           | 92     | Sulfaquinoxaline.2      | 76            | 10            | 25            | 28             | 2.08 |
| 268           | 92     | Sulfisoxazole.1         | 66            | 10            | 37            | 8              | 2.03 |
| 268           | 113    | Sulfisoxazole.2         | 66            | 10            | 37            | 8              | 2.03 |
| Tetracyclines |        |                         |               |               |               |                |      |
| 479           | 444    | Chlortetracycline.1     | 76            | 10            | 31            | 12             | 1.87 |
| 479           | 462    | Chlortetracycline.2     | 71            | 10            | 31            | 12             | 1.87 |
| 445           | 428    | Doxycycline.1           | 76            | 10            | 29            | 12             | 1.89 |
| 445           | 267    | Doxycycline.2           | 71            | 10            | 29            | 12             | 1.89 |
| 461           | 426.2  | Oxytetracycline.1       | 81            | 10            | 27            | 12             | 1.76 |
| 461           | 443.1  | Oxytetracycline.2       | 81            | 10            | 19            | 12             | 1.76 |
| 445.1         | 410.14 | Tetracycline.1          | 61            | 10            | 27            | 6              | 1.8  |
| 445.1         | 427.1  | Tetracycline.2          | 61            | 10            | 19            | 12             | 1.8  |
| Macrolides    |        |                         |               |               |               |                |      |
| 734.3         | 576.4  | Erythromycin.1          | 61            | 10            | 27            | 18             | 1.95 |
| 734.3         | 558.4  | Erythromycin.2          | 61            | 10            | 27            | 16             | 1.95 |
| 869.6         | 696.5  | Tilmicosin.1            | 171           | 10            | 51            | 22             | 1.86 |
| 869.6         | 522.6  | Tilmicosin.2            | 171           | 10            | 61            | 18             | 1.86 |
| 916.6         | 772.5  | Tylosin.1               | 116           | 10            | 39            | 22             | 1.97 |
| 916.6         | 598.5  | Tylosin.2               | 116           | 10            | 45            | 20             | 1.97 |
| 806.7         | 420.5  | Tulathromycin.2         | 111           | 10            | 45            | 14             | 1.72 |
| Beta-lactams  |        |                         |               |               |               |                |      |
| 366.2         | 349.1  | Amoxicillin.1           | 61            | 10            | 13            | 10             | 1.82 |

| Q1    | Q3    | ID            | DP<br>(volts) | EP<br>(volts) | CE<br>(volts) | CXP<br>(volts) | R.T    |
|-------|-------|---------------|---------------|---------------|---------------|----------------|--------|
| 366.2 | 114   | Amoxicillin.2 | 61            | 10            | 27            | 10             | 1.82   |
| 350.1 | 106.1 | Ampicillin.1  | 56            | 10            | 29            | 8              | 1.86   |
| 350   | 114   | Ampicillin.2  | 71            | 10            | 31            | 10             | 11.860 |

### Coccidiostats

Analytical column: Synergi fusion 4µm, 2×50 mm, Phenomenex

Mobile phase: Channel A: Ammonium formate 0.01M pH +0.1% formic acid

Channel B: Acetonitrile

Mobile phase time table:

| time<br>(min) | flow rate<br>(µL/min) | channel<br>A | channel<br>B |
|---------------|-----------------------|--------------|--------------|
| 0             | 600                   | 90           | 10           |
| 5             | 600                   | 10           | 90           |
| 6.5           | 600                   | 10           | 90           |
| 6.7           | 600                   | 90           | 10           |
| 9.5           | 600                   | 90           | 10           |

Volume of injection: 5µl

Column oven: 40°C

Source: ESI

Scan type: MRM

Source:

CUR: 20

IS: -4500

TEM: 550

GS1: 45

GS2: 45

MS parameters:

| Q1<br>(Da)           | Q3<br>(Da) | Time (msec) | ID            | DP<br>(v) | EP(v) | CE<br>(v) | CEP<br>(v) | CXP<br>(v) | R.T  |
|----------------------|------------|-------------|---------------|-----------|-------|-----------|------------|------------|------|
| Positive<br>polarity |            |             |               |           |       |           |            |            |      |
| 934.6                | 629.4      | 20          | Maduramicin.1 | 51        | 4.5   | 70        | 37         | 6          | 6.86 |
| 934.6                | 393.3      | 20          | Maduramicin.2 | 51        | 4.5   | 70        | 39         | 6          | 6.86 |
| 688.4                | 461.3      | 20          | Monensin.1    | 36        | 4.5   | 80        | 33         | 6          | 8.16 |
| 688.4                | 635.5      | 20          | Monensin.2    | 36        | 4.5   | 80        | 25         | 6          | 8.16 |
| 768.5                | 733.6      | 20          | Salinomycin.1 | 46        | 4.5   | 36        | 25         | 6          | 8.17 |
| 768.5                | 373.4      | 20          | Salinomycin.2 | 46        | 4.5   | 36        | 41         | 6          | 8.17 |
| 608.3                | 237.3      | 20          | Lasalocid.1   | 21        | 6.5   | 24        | 31         | 4          | 7.31 |
| 608.3                | 337.4      | 20          | Laslocid.2    | 21        | 6.5   | 24        | 25         | 4          | 7.31 |
| 782.3                | 747.4      | 20          | Narasin.1     | 56        | 6.5   | 32        | 33         | 8          | 6.68 |
| 782.3                | 373.2      | 20          | Narasin.2     | 56        | 6.5   | 32        | 43         | 6          | 6.69 |

|                   |       |     |                         |      |      |     |    |     |      |
|-------------------|-------|-----|-------------------------|------|------|-----|----|-----|------|
| 418.2             | 372.2 | 20  | Decoquinate.1           | 56   | 4.5  | 18  | 29 | 6   | 6.4  |
| 418.2             | 204.1 | 20  | Decoquinate.2           | 56   | 4.5  | 18  | 55 | 6   | 6.4  |
| 334.1             | 137.9 | 20  | Robenidine.1            | 51   | 9    | 18  | 33 | 4   | 4.38 |
| 334.1             | 155.2 | 20  | Robenidine.2            | 51   | 9    | 18  | 27 | 4   | 4.38 |
| 416.1             | 100.2 | 20  | Hlofuginone.1           | 51   | 5    | 22  | 37 | 4   | 3.35 |
| 416.1             | 120.1 | 20  | Hlofuginone.2           | 51   | 5    | 22  | 27 | 4   | 5.29 |
| 192               | 101   | 20  | Clopidol.1              | 71   | 11   | 14  | 35 | 4   | 1.26 |
| 192               | 128   | 20  | Clopidol.2              | 71   | 10.5 | 14  | 35 | 4   | 1.22 |
| 342.1             | 142.1 | 20  | Robenidine-d8.1 (i.std) | 56   | 8.5  | 16  | 33 | 4   |      |
| Negative polarity |       |     |                         |      |      |     |    |     |      |
| 301               | 137   | -30 | Nicabazin.1             | -9.5 | -14  | -20 | -2 | 301 | 5.06 |
| 301               | 107   | -30 | Nicarbazin.2            | -10  | -14  | -20 | -2 | 301 | 5.07 |
| 405               | 334   | -45 | diclazuril.1            | -4.5 | -18  | -20 | -4 | 405 | 5.4  |
| 407               | 336   | -55 | diclazuril.2            | -4   | -16  | -20 | -4 | 407 | 5.4  |

**TableS6.** Determination of signal to noise (S/N) at the LOQ levels.

|                  |                       | Peak Area                     |      | Peak Area                     |      | Peak Area |      | S/N        |
|------------------|-----------------------|-------------------------------|------|-------------------------------|------|-----------|------|------------|
|                  |                       | Standard                      | CV%  | LOQ                           | CV%  | Blank     | CV%  |            |
|                  |                       | (0.1<br>mg•kg <sup>-1</sup> ) |      | (0.1<br>mg•kg <sup>-1</sup> ) |      | Samples   |      |            |
| Coccidiostats    | Narasin               | 179333.3                      | 7.6  | 128666.7                      | 17.2 | 2613.8    | 11.5 | 49         |
|                  | Clopidol              | 66033.3                       | 12.6 | 23500.0                       | 2.0  | N.D       | N.D  | >10*       |
|                  | Nicarbazine           | 231333.3                      | 7.0  | 308000.0                      | 2.5  | 5410.0    | 6.3  | 56.9       |
|                  | Maduramycin           | 48200.0                       | 3.3  | 36433.3                       | 1.7  | N.D       | N.D  | >10*       |
|                  | Monensin              | 68666.7                       | 1.8  | 108333.3                      | 2.8  | 6430.9    | 5.2  | 16.8       |
|                  | Robenidine            | 93700.0                       | 1.4  | 22933.3                       | 2.4  | 1475.7    | 2.9  | 15.5       |
|                  | Salinomycin           | 193333.3                      | 6.5  | 196333.3                      | 1.1  | 5076.9    | 3.9  | 38.7       |
|                  | Semduramycin          | 15200.0                       | 0.7  | 47200.0                       | 5.0  | N.D       | N.D  | >10*       |
|                  | Lasalocid             | 128333.3                      | 1.6  | 65600.0                       | 0.7  | 971.3     | 4.2  | 67.5       |
|                  | Decoquinat            | 918000.0                      | 3.9  | 355000.0                      | 3.7  | 46672.1   | 0.7  | <b>7.6</b> |
| Sulfonamides     | Sulfachloropyrazine   | 42600.0                       | 7.4  | 21333.3                       | 15.5 | N.D       | N.D  | >10*       |
|                  | Sulfachloropyridazine | 155333.3                      | 14.2 | 63366.7                       | 13.8 | 5705.1    | 20.7 | 11.1       |
|                  | Sulfadiazine          | 657000.0                      | 1.8  | 330000.0                      | 4.8  | N.D       | N.D  | >10*       |
|                  | Sulfadimidine         | 437666.7                      | 0.7  | 225666.7                      | 6.7  | N.D       | N.D  | >10*       |
|                  | Sulfaquinoxaline      | 346333.3                      | 10.9 | 156666.7                      | 2.1  | N.D       | N.D  | >10*       |
| Macrolides       | Tilmicosin            | 24400.0                       | 5.4  | 1613.3                        | 2.9  | N.D       | N.D  | >10*       |
|                  | Tylosin               | 576000.0                      | 4.7  | 1426.7                        | 11.0 | N.D       | N.D  | >10*       |
|                  | Erythromycin          | 10766.7                       | 6.8  | 416.7                         | 21.8 | N.D       | N.D  | >10*       |
| Fluoroquinolones | Danofloxacin          | 1533333.3                     | 0.8  | 95900.0                       | 5.4  | N.D       | N.D  | >10*       |
|                  | Ciprofloxacin         | 725000.0                      | 4.1  | 25933.3                       | 2.6  | N.D       | N.D  | >10*       |
|                  | Norfloxacin           | 817666.7                      | 6.6  | 34866.7                       | 3.2  | N.D       | N.D  | >10*       |
|                  | Enrofloxacin          | 1546666.7                     | 7.1  | 91300.0                       | 1.3  | N.D       | N.D  | >10*       |
| Tetracycline     | Doxycycline           | 184666.7                      | 1.6  | 333000.0                      | 4.4  | N.D       | N.D  | >10*       |
|                  | Oxytetracycline       | 143333.3                      | 4.3  | 165666.7                      | 1.5  | N.D       | N.D  | >10*       |
|                  | Chlortetracycline     | 13733.3                       | 0.1  | 332000.0                      | 8.5  | N.D       | N.D  | >10*       |
|                  | Tetracycline          | 227333.3                      | 7.1  | 375333.3                      | 1.8  | N.D       | N.D  | >10*       |
| beta-Lactams     | Amoxicillin           | 21366.7                       | 7.5  | 12433.3                       | 6.8  | N.D       | N.D  | >10*       |
|                  | Ampicillin            | 74166.7                       | 5.9  | 48466.7                       | 3.8  | N.D       | N.D  | >10*       |

N.D; Not detected; \* no peak detected in blank.



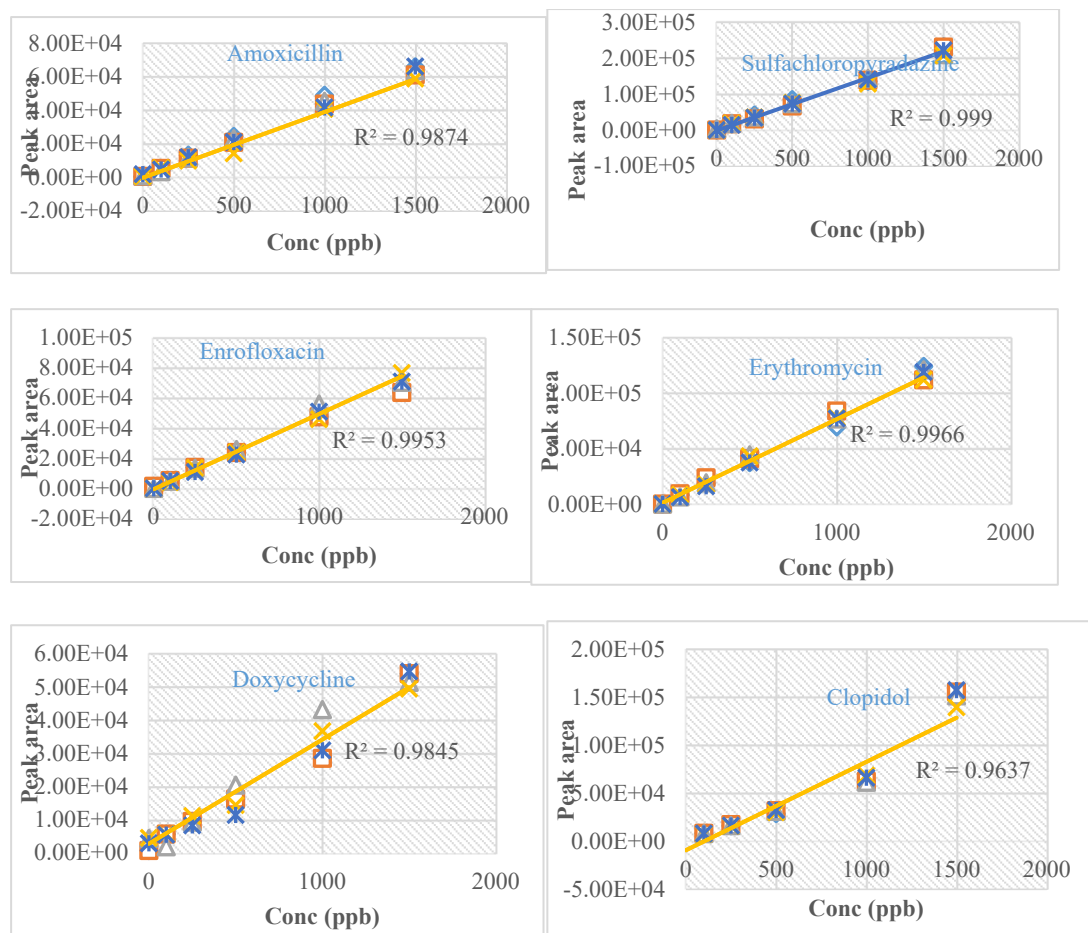

**Figure S1.** Calibration curves for some antimicrobials and coccidiostats in fortified PL ( $n = 5$ ) as described in Section 4.7.

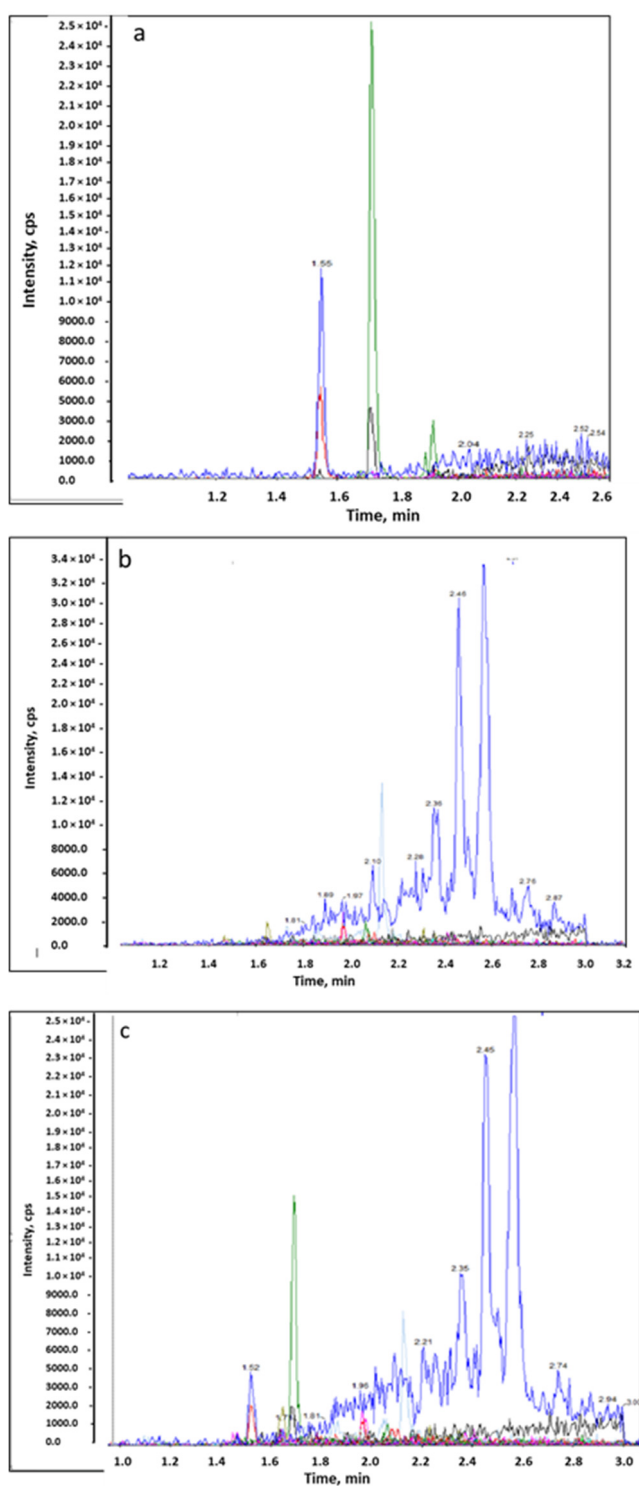

**Figure S2.** Chromtograms of beta-lactams in standard solution (a), blank matrix (b), and spiked matrix (c).

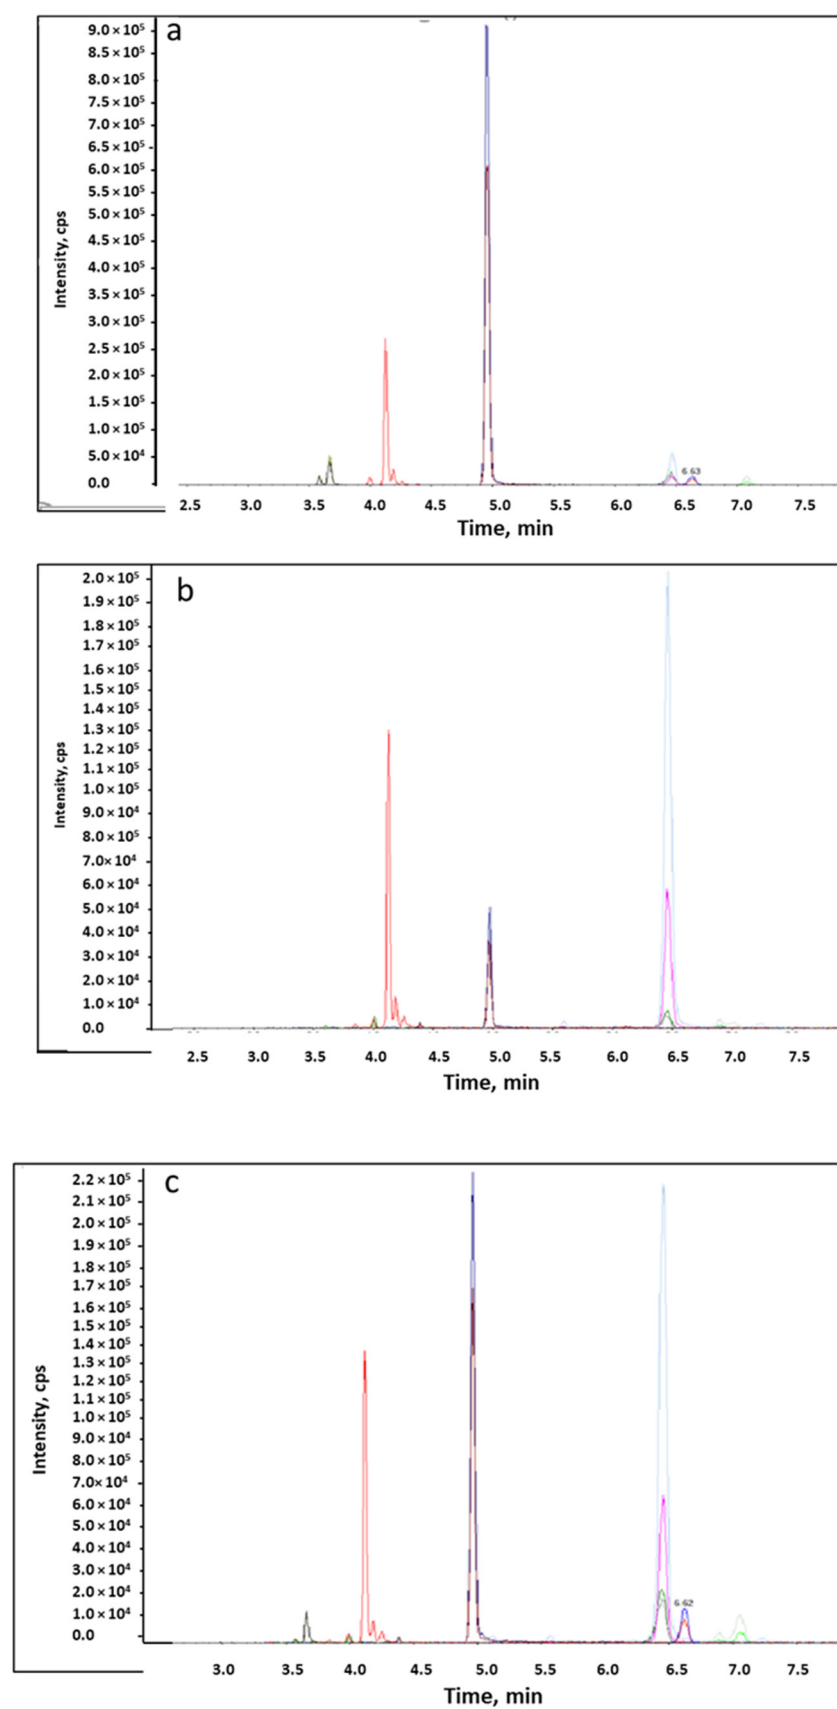

**Figure S3.** Chromatograms of coccidiostats in positive mode, standard solution (a), blank matrix (b), and spiked matrix (c).

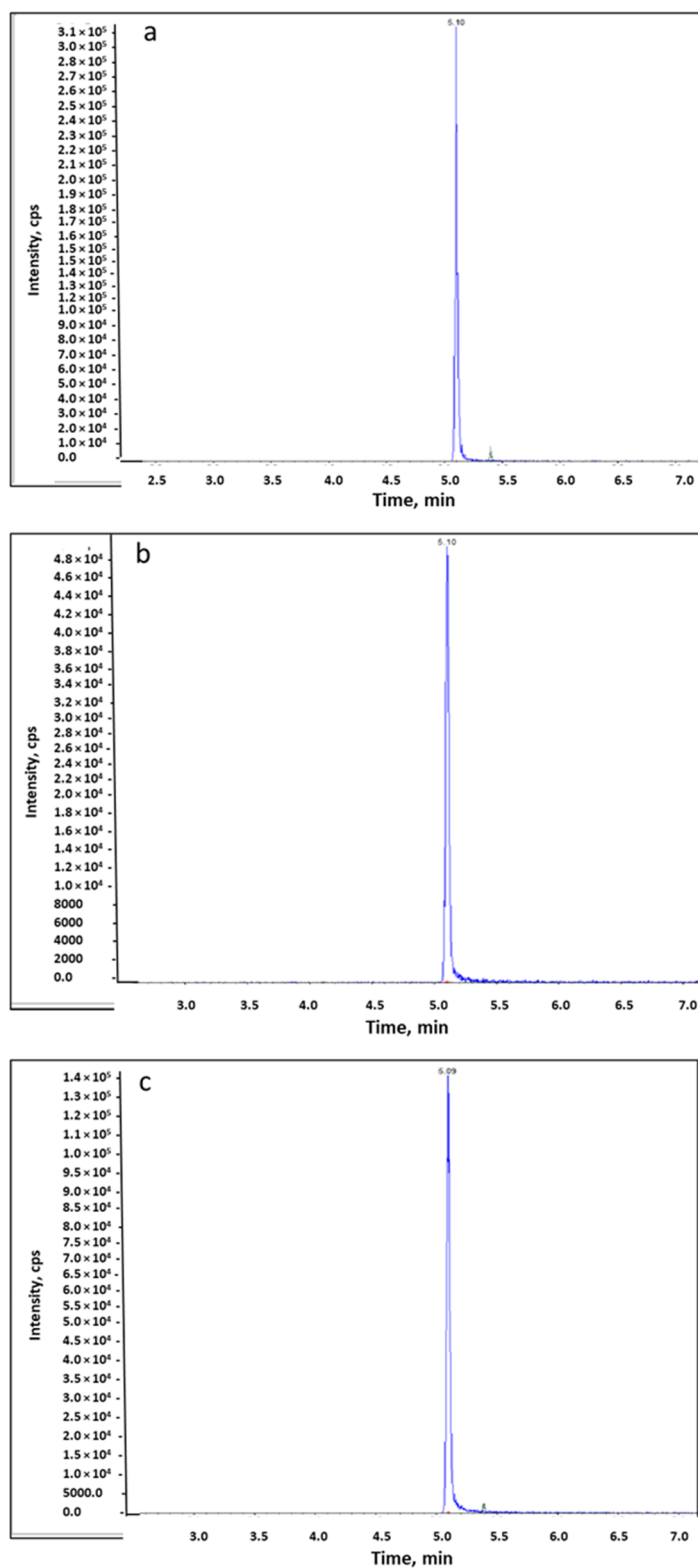

**Figure S4.** Chromtograms of coccidiostats in negative mode, standard solution (a), blank matrix (b), and spiked matrix (c).
